# Supplementary material for: Hormone replacement therapy for postmenopausal atherosclerosis is offset by late age iron deposition
Source: eLife journal article supplement (doi:10.7554/elife.80494), 2022-10-17
Supplement: fig1-data1 [file Fig1B patient serum iron.xlsx]

## Sheet: Sheet1
Early	Late
130.8	196
163.2	221.6
148	285.3
125.2	247
105.5	162.8
114.2	237.1
172	211.2
146	208.2
102.8	152
125.4	149.5
