# Supplementary material for: Hormone replacement therapy for postmenopausal atherosclerosis is offset by late age iron deposition
Source: eLife journal article supplement (doi:10.7554/elife.80494), 2022-10-17
Supplement: fig1-data1 [file Fig1C serum ferritin.xlsx]

## Sheet: Sheet1
Early	Late
0.25	0.2855
0.2375	0.243
0.235	0.27
0.1925	0.2625
0.23	0.2575
0.2275	0.2565
0.219	0.2535
0.223	0.25
0.218	0.243
0.204	0.2455
