# Supplementary material for: Hormone replacement therapy for postmenopausal atherosclerosis is offset by late age iron deposition
Source: eLife journal article supplement (doi:10.7554/elife.80494), 2022-10-17
Supplement: fig1-data1 [file Fig1D serum lipid.xlsx]

## Sheet: Sheet1
	TC	HDL	LDL	TG
5001	178	32	124	139
5002	245	54	169	176
5003	156	24	110	122
5004	142	38	97	107
5005	188	27	157	141
5006	203	32	144	162
5007	226	33	175	203
5008	261	59	196	226
5009	204	62	125	180
5010	188	38	137	143
5011	232	36	184	220
5012	306	28	260	277
5013	280	30	229	261
5014	174	46	117	154
5015	341	47	252	302
5016	265	64	178	215
5017	169	28	128	140
5018	377	52	298	352
5019	327	67	201	287
5020	211	40	149	174
5001-5010 for early group and 5011-5020 for late group
