# Supplementary material for: Hormone replacement therapy for postmenopausal atherosclerosis is offset by late age iron deposition
Source: eLife journal article supplement (doi:10.7554/elife.80494), 2022-10-17
Supplement: fig1-data1 [file serum hepcidin.xlsx]

## Sheet: Sheet1
serum hepcidin	1	2
P1	0.239	0.235	0.237
P2	0.248	0.25	0.249
P3	0.162	0.133	0.1475
P4	0.211	0.201	0.206
P5	0.362	0.338	0.35
P6	0.271	0.254	0.2625
P7	0.134	0.146	0.14
P8	0.183	0.175	0.179
P9	0.305	0.284	0.2945
P10	0.248	0.263	0.2555
P11	0.518	0.504	0.511
P12	0.453	0.416	0.4345
P13	0.42	0.441	0.4305
P14	0.613	0.598	0.6055
P15	0.344	0.305	0.3245
P16	0.694	0.697	0.6955
P17	0.537	0.55	0.5435
P18	0.462	0.426	0.444
P19	0.572	0.603	0.5875
P20	0.552	0.543	0.5475
