# Supplementary material for: Hormone replacement therapy for postmenopausal atherosclerosis is offset by late age iron deposition
Source: eLife journal article supplement (doi:10.7554/elife.80494), 2022-10-17
Supplement: fig2-data1 [file Fig2C quantification of Fig2B.xlsx]

## Sheet: Sheet1
	early-sham	early-E2	Late-sham	Late-E2
lesion area	3.36	0.32	5.1	5.52
	2.1	0.46	4.52	11.43
	1.37	0.23	4.28	7.23
	1.47	1.16	4.61	8.35
