# Supplementary material for: Hormone replacement therapy for postmenopausal atherosclerosis is offset by late age iron deposition
Source: eLife journal article supplement (doi:10.7554/elife.80494), 2022-10-17
Supplement: fig2-data1 [file Fig2F serum lipid.xlsx]

## Sheet: Sheet1
	TC	HDL	LDL	TG	mg/dl
ES1	168	126	18	129
ES2	177	108	32	133		ES=early sham
ES3	253	172	56	207		EE=early E2
ES4	226	165	25	182		LS=late sham
ES5	192	164	15	165		LE=late E2
ES6	138	97	34	109		p=premenopause
EE1	152	124	16	96
EE2	166	108	41	140
EE3	120	84	22	95
EE4	145	116	24	79
EE5	174	138	27	142
EE6	133	108	16	112
LS1	276	202	53	236
LS2	254	197	34	211
LS3	237	178	46	204
LS4	206	169	30	176
LS5	311	244	57	262
LS6	295	245	38	253
LE1	323	269	51	277
LE2	294	234	47	265
LE3	381	263	97	346
LE4	287	211	55	237
LE5	296	227	48	235
LE6	352	283	65	303
P1	118	95	23	102
P2	104	75	12	79
P3	125	95	14	95
P4	143	116	20	126
P5	128	94	18	102
P6	103	78	17	96
