# Supplementary material for: Hormone replacement therapy for postmenopausal atherosclerosis is offset by late age iron deposition
Source: eLife journal article supplement (doi:10.7554/elife.80494), 2022-10-17
Supplement: fig2-data1 [file Fig2G ferrozine.xlsx]

## Sheet: Sheet1
Aorta	Early-sham	Early-E2	Late-sham	Late-E2
	250.127	173.161	276.59	178.996
	151.933	107.173	359.798	191.681
	193.195	125.612	398.33	208.253
	179.996	121.018	430.993	236.556
	187.585	125.082	379.783	186.612
	203.564	103.425	403.233	187.573
Liver	Early-sham	Early-E2	Late-sham	Late-E2
	471.44	433.038	513.44	498.925
	430.777	404.625	633.895	474.625
	475.949	415.23	649.535	513.081
	450.485	375.682	556.974	507.565
