# Supplementary material for: Hormone replacement therapy for postmenopausal atherosclerosis is offset by late age iron deposition
Source: eLife journal article supplement (doi:10.7554/elife.80494), 2022-10-17
Supplement: fig2-data1 [file Fig2H serum iron.xlsx]

## Sheet: Sheet1
	Pre	Early-sham	Early-E2	Late-sham	Late-E2
	48.4	51.1	65.6	52.2	73.8
	30.8	57.8	69.8	56.4	60.6
	50.4	38.6	67.6	55.8	75.4
	36.2	46.2	57.2	47.8	66
	42.2	50.3	64.3	58.8	78.5
	36.6	48.2	66.8	59.1	70.4
