# Supplementary material for: Hormone replacement therapy for postmenopausal atherosclerosis is offset by late age iron deposition
Source: eLife journal article supplement (doi:10.7554/elife.80494), 2022-10-17
Supplement: fig3-data1 [file Fig3C quantification of Fig3B.xlsx]

## Sheet: Sheet1
	ApoE+saline	AF+saline	AF+E2		AF=Apoe-/-FpnlysM/lysM
Lesion area	5.2	14.65	25.95
	5.86	13.92	26.62
	7.45	12.75	22.12
	5.33	18.97	20.65
