# Supplementary material for: Hormone replacement therapy for postmenopausal atherosclerosis is offset by late age iron deposition
Source: eLife journal article supplement (doi:10.7554/elife.80494), 2022-10-17
Supplement: fig3-data1 [file Fig3D ferrozine.xlsx]

## Sheet: Sheet1
Aorta	ApoE+saline	AF+saline	AF+E2		AF=Apoe-/-FpnlysM/lysM
	260.298	343.413	319.738
	229.137	374.999	368.025
	283.369	393.916	393.796
	281.207	385.423	328.8
Liver
	443.456	663.072	709.153
	503.087	590.5	630.525
	461.657	710.617	571.245
	515.762	767.987	601.775
