# Supplementary material for: Hormone replacement therapy for postmenopausal atherosclerosis is offset by late age iron deposition
Source: eLife journal article supplement (doi:10.7554/elife.80494), 2022-10-17
Supplement: fig3-data1 [file Fig3F-serum iron.xlsx]

## Sheet: Sheet1
	ApoE+saline	AF+saline	AF+E2		AF=Apoe-/-FpnlysM/lysM
	72.5	56.2	64
	64.2	47	60.1
	70.6	54.6	62.4
	66.8	58.8	56.6
	66.2	50.2	58.2
	68	50.4	62
