# Supplementary material for: Hormone replacement therapy for postmenopausal atherosclerosis is offset by late age iron deposition
Source: eLife journal article supplement (doi:10.7554/elife.80494), 2022-10-17
Supplement: fig3-data1 [file Fig3G-serum lipid.xlsx]

## Sheet: Sheet1
	TC	HDL	LDL	TG
A1	176	113	42	142			A=ApoE+saline
A2	154	107	24	116			AF=Apoe-/-FpnlysM/lysM+saline
A3	232	185	33	178			AFE=Apoe-/-FpnlysM/lysM+E2
A4	228	188	28	194
A5	253	204	35	205
A6	197	143	39	172
AF1	288	192	76	243
AF2	275	190	62	239
AF3	316	218	73	262
AF4	276	215	45	225
AF5	241	184	42	180
AF6	259	168	64	203
AFE1	298	224	58	246
AFE2	332	247	72	292
AFE3	280	206	64	236
AFE4	324	214	95	269
AFE5	315	220	81	284
AFE6	292	191	77	249
