# Supplementary material for: Hormone replacement therapy for postmenopausal atherosclerosis is offset by late age iron deposition
Source: eLife journal article supplement (doi:10.7554/elife.80494), 2022-10-17
Supplement: fig3-figsupp1-data1 [file SFig1A ferrozine.xlsx]

## Sheet: Sheet1
Aorta	ApoE+saline	AF+saline	AF+E2		AF=Apoe-/-FpnlysM/lysM
	174.087	296.869	260.182
	147.745	313.52	248.077
	187.835	338.577	323.344
	181.367	321.242	308.278
Liver
	299.358	461.871	424.889
	351.405	496.821	406.552
	305.318	495.171	454.14
	272.935	468.903	479.622
