# Supplementary material for: Hormone replacement therapy for postmenopausal atherosclerosis is offset by late age iron deposition
Source: eLife journal article supplement (doi:10.7554/elife.80494), 2022-10-17
Supplement: fig3-figsupp1-data1 [file SFig1C serum iron .xlsx]

## Sheet: Sheet1
	ApoE+saline	AF+saline	AF+E2		AF=Apoe-/-FpnlysM/lysM
	43	30.8	38.2
	38.8	31.3	37.8		umol/dl
	35.2	38.5	39.9
	49.5	35.6	34.8
	40.7	34.3	33
	39	32.6	40.1
