# Supplementary material for: Hormone replacement therapy for postmenopausal atherosclerosis is offset by late age iron deposition
Source: eLife journal article supplement (doi:10.7554/elife.80494), 2022-10-17
Supplement: fig4-data1 [file Fig4D J774a.1 Ferrozine.xlsx]

## Sheet: Sheet1
	sham	E2	FAC	E2+FAC	FAC+DFP	E2+FAC+DFP
	19.781	14	105.118	81.2278	65.0453	45.7445
	13.0759	14.6686	89.1913	87.1548	78.0424	33.4467
	17.7049	13.7734	96.1518	59.5986	50.9664	27.0759
	16.8615	16.3887	94.5591	49.3737	44.5956	17.5197
