# Supplementary material for: Hormone replacement therapy for postmenopausal atherosclerosis is offset by late age iron deposition
Source: eLife journal article supplement (doi:10.7554/elife.80494), 2022-10-17
Supplement: fig4-data1 [file Fig4I.xlsx]

## Sheet: Sheet1
sham	E2	FAC	E2+FAC
5011.24	5023.8	4428.6	2963.97		pg/ml
4809.72	5471.34	3202.34	2207.12
4313.69	6119.72	3607.02	2604.49
4420.82	6283.05	3993.06	2983.37
