# Supplementary material for: Hormone replacement therapy for postmenopausal atherosclerosis is offset by late age iron deposition
Source: eLife journal article supplement (doi:10.7554/elife.80494), 2022-10-17
Supplement: fig4-data2 [file Quantification.xlsx]

## Sheet: Sheet1
group	cell count	positive area	average
f	23	107188	4660.35	3.85328
f	24	122848	5118.67	4.23223
f	36	183329	5092.47	4.21057
f	33	136793	4145.24	3.42738
c	20	24189	1209.45	1
c	23	25338	1101.65	0.91087
c	31	28998	935.419	0.773425
c	28	32891	1174.68	0.97125
e	33	29971	908.212	0.75093
e	23	19184	834.087	0.689642
e	25	20030	801.2	0.66245
e	32	24423	763.219	0.631046
ef	24	144776	6032.33	4.98767
ef	24	127981	5332.54	4.40906
ef	35	214708	6134.51	5.07215
ef	32	212308	6634.62	5.48565
