# Supplementary material for: Hormone replacement therapy for postmenopausal atherosclerosis is offset by late age iron deposition
Source: eLife journal article supplement (doi:10.7554/elife.80494), 2022-10-17
Supplement: fig4-data4 [file Angiogenesis.xlsx]

## Sheet: Sheet1
	branch	branch length
sham	86	5128
	89	6381
	86	6077
	90	6517
E2	104	7462
	102	6365
	125	8156
	93	5647
FAC	77	4894
	74	4776
	72	4548
	80	5078
E2+FAC	62	4212
	68	3944
	41	3591
	67	3310
