# Supplementary material for: Hormone replacement therapy for postmenopausal atherosclerosis is offset by late age iron deposition
Source: eLife journal article supplement (doi:10.7554/elife.80494), 2022-10-17
Supplement: fig5-data1 [file Fig5D Mdm2 qPCR.xlsx]

## Sheet: Sheet1
	sham	E2	FAC	E2+FAC
relative level	0.923	0.956	1.375	2.393
	0.366	0.768	1.321	1.399
	0.995	0.766	1.507	1.513
	0.674	0.826	1.915	1.98
