# Supplementary material for: Hormone replacement therapy for postmenopausal atherosclerosis is offset by late age iron deposition
Source: eLife journal article supplement (doi:10.7554/elife.80494), 2022-10-17
Supplement: fig5-figsupp1-data1 [file SFig2B CAT.xlsx]

## Sheet: Sheet1
sham	E2	FAC	E2+FAC
10.14	11.074	7.299	7.299		U/mg prot
6.372	12.512	9.578	9.578
4.897	8.672	11.464	11.464
