# Supplementary material for: Hormone replacement therapy for postmenopausal atherosclerosis is offset by late age iron deposition
Source: eLife journal article supplement (doi:10.7554/elife.80494), 2022-10-17
Supplement: fig5-figsupp1-data1 [file SFig2C ER qPCR.xlsx]

## Sheet: Sheet1
FAC	0	0	25	25	50	50	100	100	200	200	uM
E2	-	+	-	+	-	+	-	+	-	+	1uM
Relative level	0.934662	1.50181	1.18508	1.27071	0.63069	0.192894	1.20076	1.18194	0.553831	1.36492
	1.06991	1.06598	0.623466	1.09347	0.975743	0.522493	0.828305	1.32708	1.03928	1.30712
	1.03289	1.7291	1.8908	1.7305	1.4969	1.13982	1.8468	1.3729	0.4237	0.4538
	0.984382	1.0852	0.729129	1.2272	2.0265	0.9986	1.1672	0.8617	1.7691	1.8213
	1.12983	1.23234	1.9436	0.4042	1.3248	1.39004	1.0673	0.732	1.3822	1.3194
