# Supplementary material for: Hormone replacement therapy for postmenopausal atherosclerosis is offset by late age iron deposition
Source: eLife journal article supplement (doi:10.7554/elife.80494), 2022-10-17
Supplement: fig6-figsupp1-data1 [file Hemoglobin.xlsx]

## Sheet: Sheet1
	Control	Late-saline	Late-E2	Late-DFP	Late-E2+DFP		g/L
1	79.2	110.8	126	94.2	120.3
2	83	102.5	135.4	89.3	114.5
3	58.7	96.3	139.6	90.6	127.2
4	66.5	102.5	132	85.1	117.6
