# Supplementary material for: Hormone replacement therapy for postmenopausal atherosclerosis is offset by late age iron deposition
Source: eLife journal article supplement (doi:10.7554/elife.80494), 2022-10-17
Supplement: figures [file elife-80494-figures-v1.pdf]

---

## Figures and figure supplements

Hormone replacement therapy for postmenopausal atherosclerosis is offset by late age iron deposition

**Tianze Xu and Jing Cai et al.**

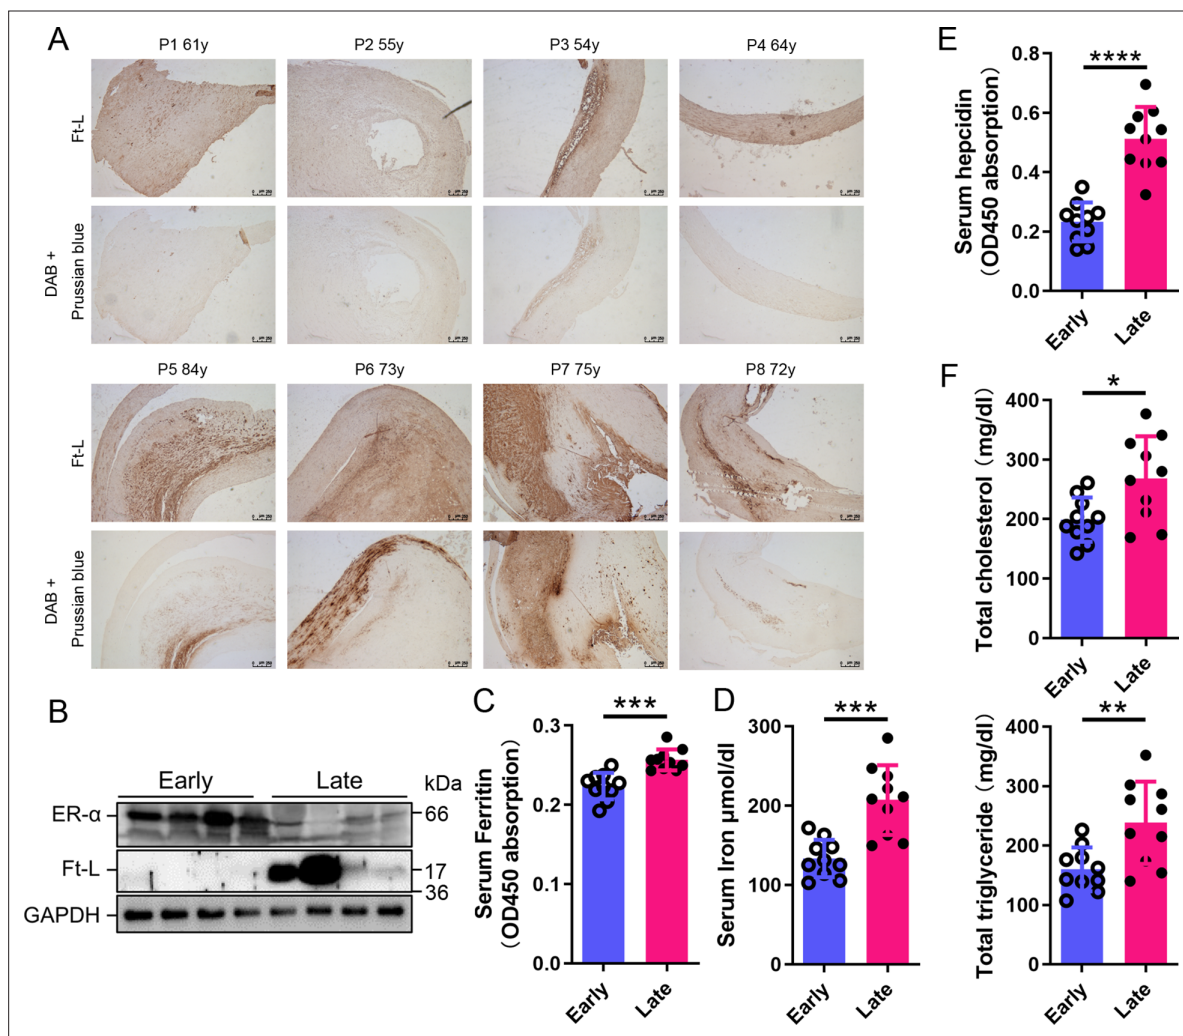

**Figure 1.** Estrogen receptor  $\alpha$  (ER $\alpha$ ) levels were negatively associated with iron content in human plaques. (A) Ferritin (Ft-L), revealed by immunohistochemistry (IHC), and iron content, revealed by DAB-enhanced Prussian blue staining, in plaque paraffin sections of eight postmenopausal patients. Upper panel: the early postmenopausal (EPM) group (P1–P4, <65 years old); lower panel: the late postmenopausal (LPM) group (P5–P8, >65 years old). (B) ER $\alpha$  and Ft-L expression in plaques measured by western blotting. The samples are the same as in (A) except for the lane switch between lane 6 (P6) and lane 7 (P7) by chance. (C) Serum ferritin levels in EPM (blue) and LPM (magenta) patients, detected by ELISA.  $n = 10/\text{group}$ , \*\*\* $p < 0.001$ . (D) Serum iron measured by using an autochemical analyzer (Beckman Coulter AU5421, CA).  $n = 10/\text{group}$ , \*\*\* $p < 0.001$ . (E) Serum hepcidin levels detected by ELISA.  $n = 10/\text{group}$ , \*\*\*\* $p < 0.0001$ . (F) Serum total cholesterol (left) and total triglyceride (right) levels.  $n = 10/\text{group}$ , \* $p < 0.05$ , \*\* $p < 0.01$ . Student's  $t$ -test analysis was used for (C–F).

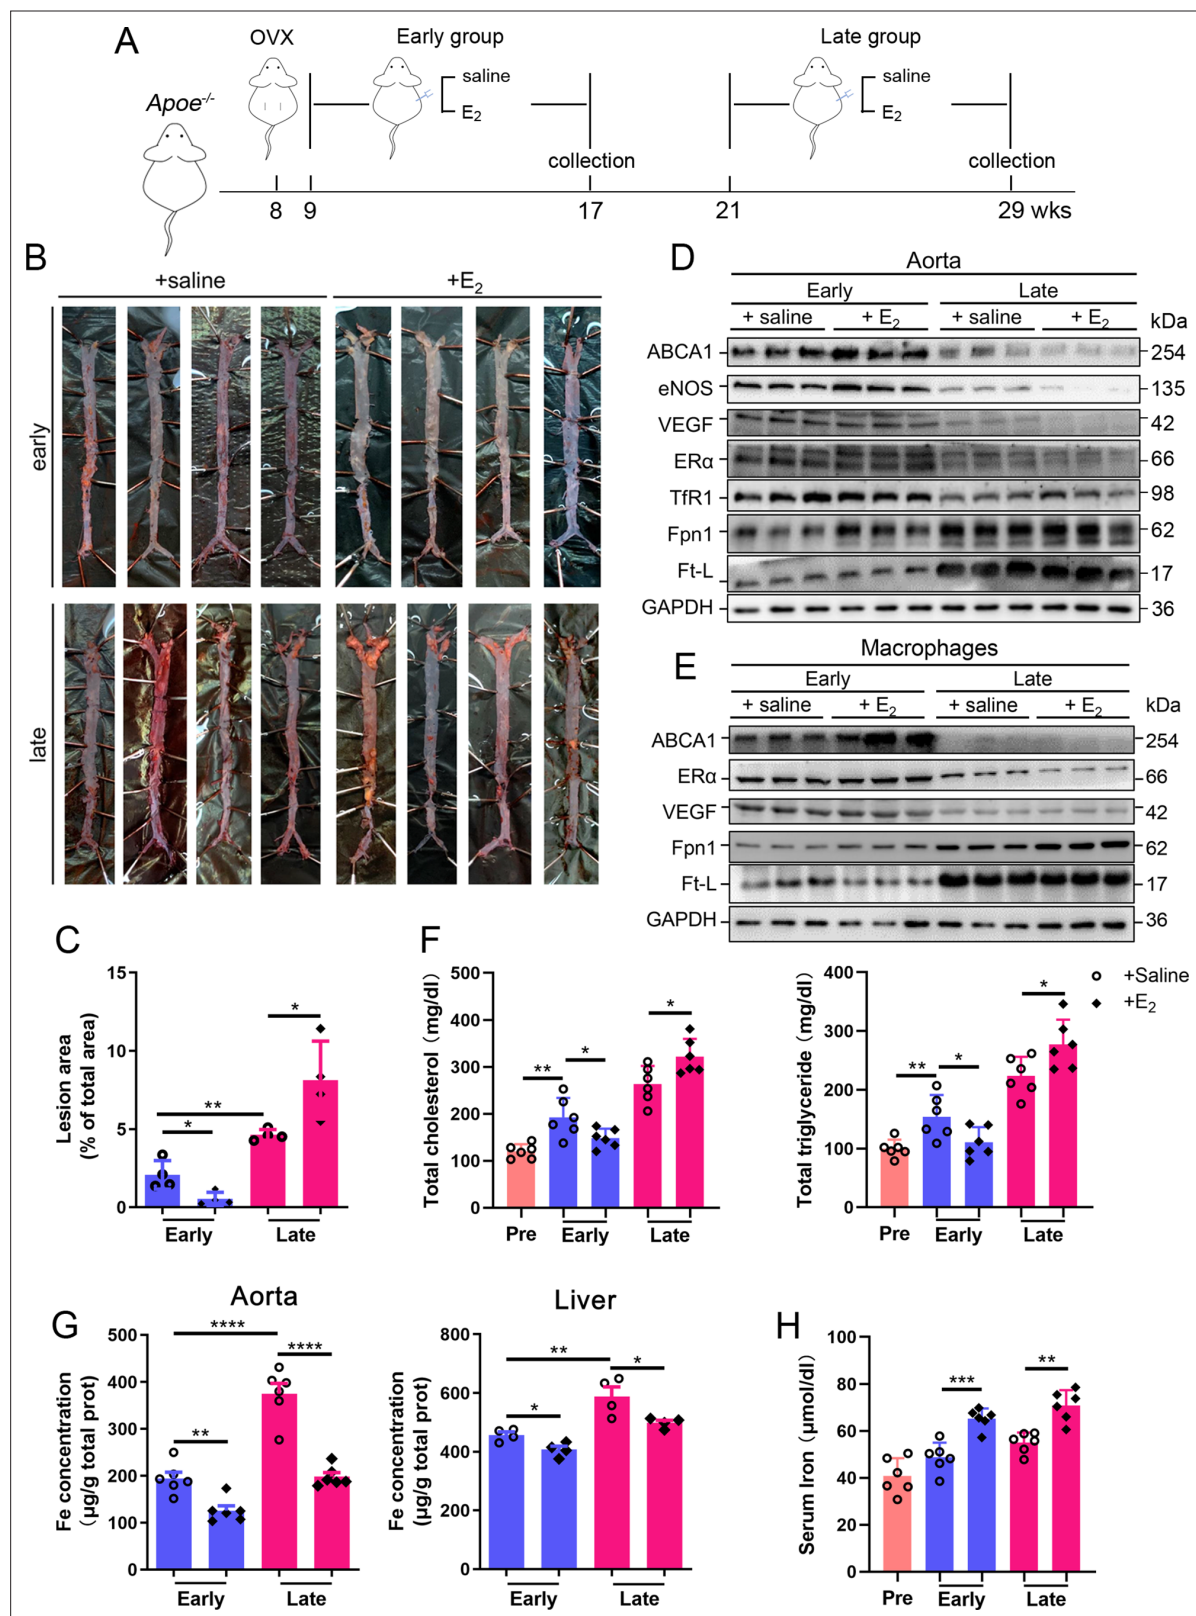

**Figure 2.** Atherosclerosis was aggravated in  $E_2$ -treated late postmenopausal  $Apoe^{-/-}$  mice with lower  $ER\alpha$  expression. **(A)** Flow diagram of mouse modeling. Early  $E_2$ -treatment group: ovariectomy (OVX) at 8 weeks old, 1-wk recovery,  $E_2$  treatment for 8 wk; late  $E_2$ -treatment group: OVX at 8 weeks old,  $E_2$  treatment from 21 weeks old to 29 weeks old for 8 wk. Saline is vehicle control. Mice were fed high-fat chow from 9 weeks old. **(B)** Oil red O-stained aortic lesions in  $Apoe^{-/-}$  mice after  $E_2$  treatment for 8 wk in the early postmenopausal (EPM) or late postmenopausal (LPM) group. **(C)** Statistical

Figure 2 continued on next page

*Figure 2 continued*

analysis of the area of atherosclerotic plaque in the aorta.  $n = 4/\text{group}$ ,  $*p < 0.05$ ,  $**p < 0.01$ . **(D)** The expression of iron-related or ER $\alpha$ -targeted proteins in the aorta, detected by western blotting. **(E)** Protein expression in peritoneal macrophages detected by western blotting. Macrophages were isolated from four mouse groups (early/late  $\pm E_2$ , for details see 'Materials and methods'). **(F)** Serum total cholesterol and total triglyceride levels in the four mouse groups. Pre: serum samples before OVX as a control group.  $n = 6/\text{group}$ ,  $*p < 0.05$ ,  $**p < 0.01$ . **(G)** Iron content in aorta and liver, detected by ferrozine assays.  $n = 6/\text{group}$ ,  $****p < 0.0001$ ,  $**p < 0.01$ ,  $*p < 0.05$ . **(H)** Serum iron in different groups, detected by using an autochemical analyzer (Beckman Coulter AU5421).  $n = 6/\text{group}$ ,  $***p < 0.001$ ,  $**p < 0.01$ . Student's *t*-test analysis was used for **(C, F–H)**.



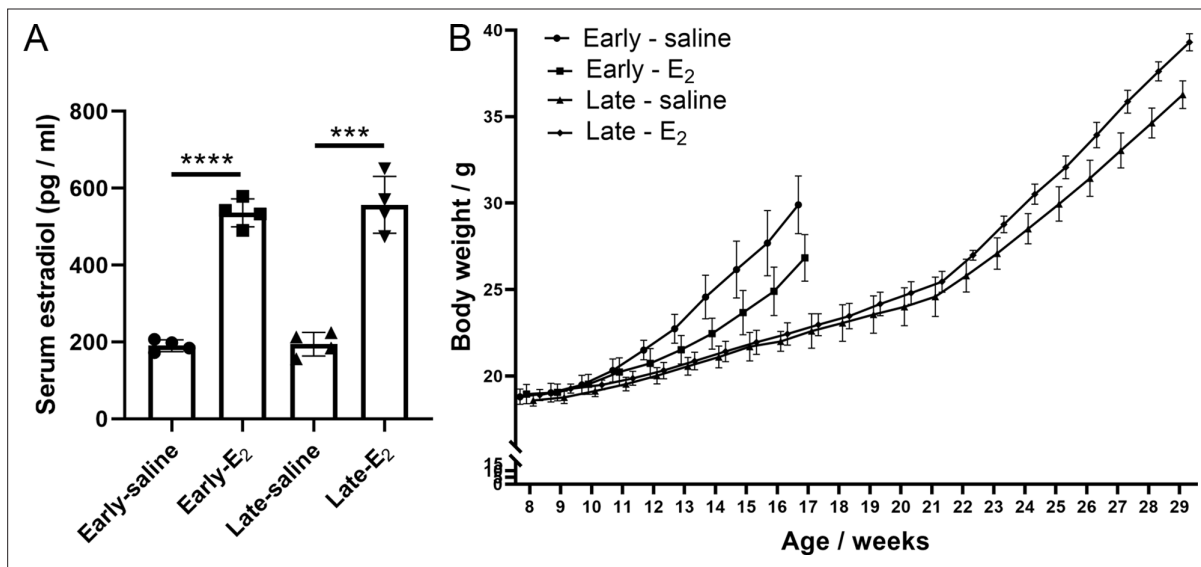

**Figure 2—figure supplement 1.** Serum E<sub>2</sub> and body weight of postmenopausal *Apoe*<sup>-/-</sup> mice. **(A)** Serum E<sub>2</sub> levels after peritoneal E<sub>2</sub> administration (3 µg/kg daily for 8 wk, n = 4) with Student's *t*-test analysis. **(B)** Body weight of *Apoe*<sup>-/-</sup> mice after E<sub>2</sub> treatment for 8 wk in the early postmenopausal (EPM) or late postmenopausal (LPM) groups (n = 6).

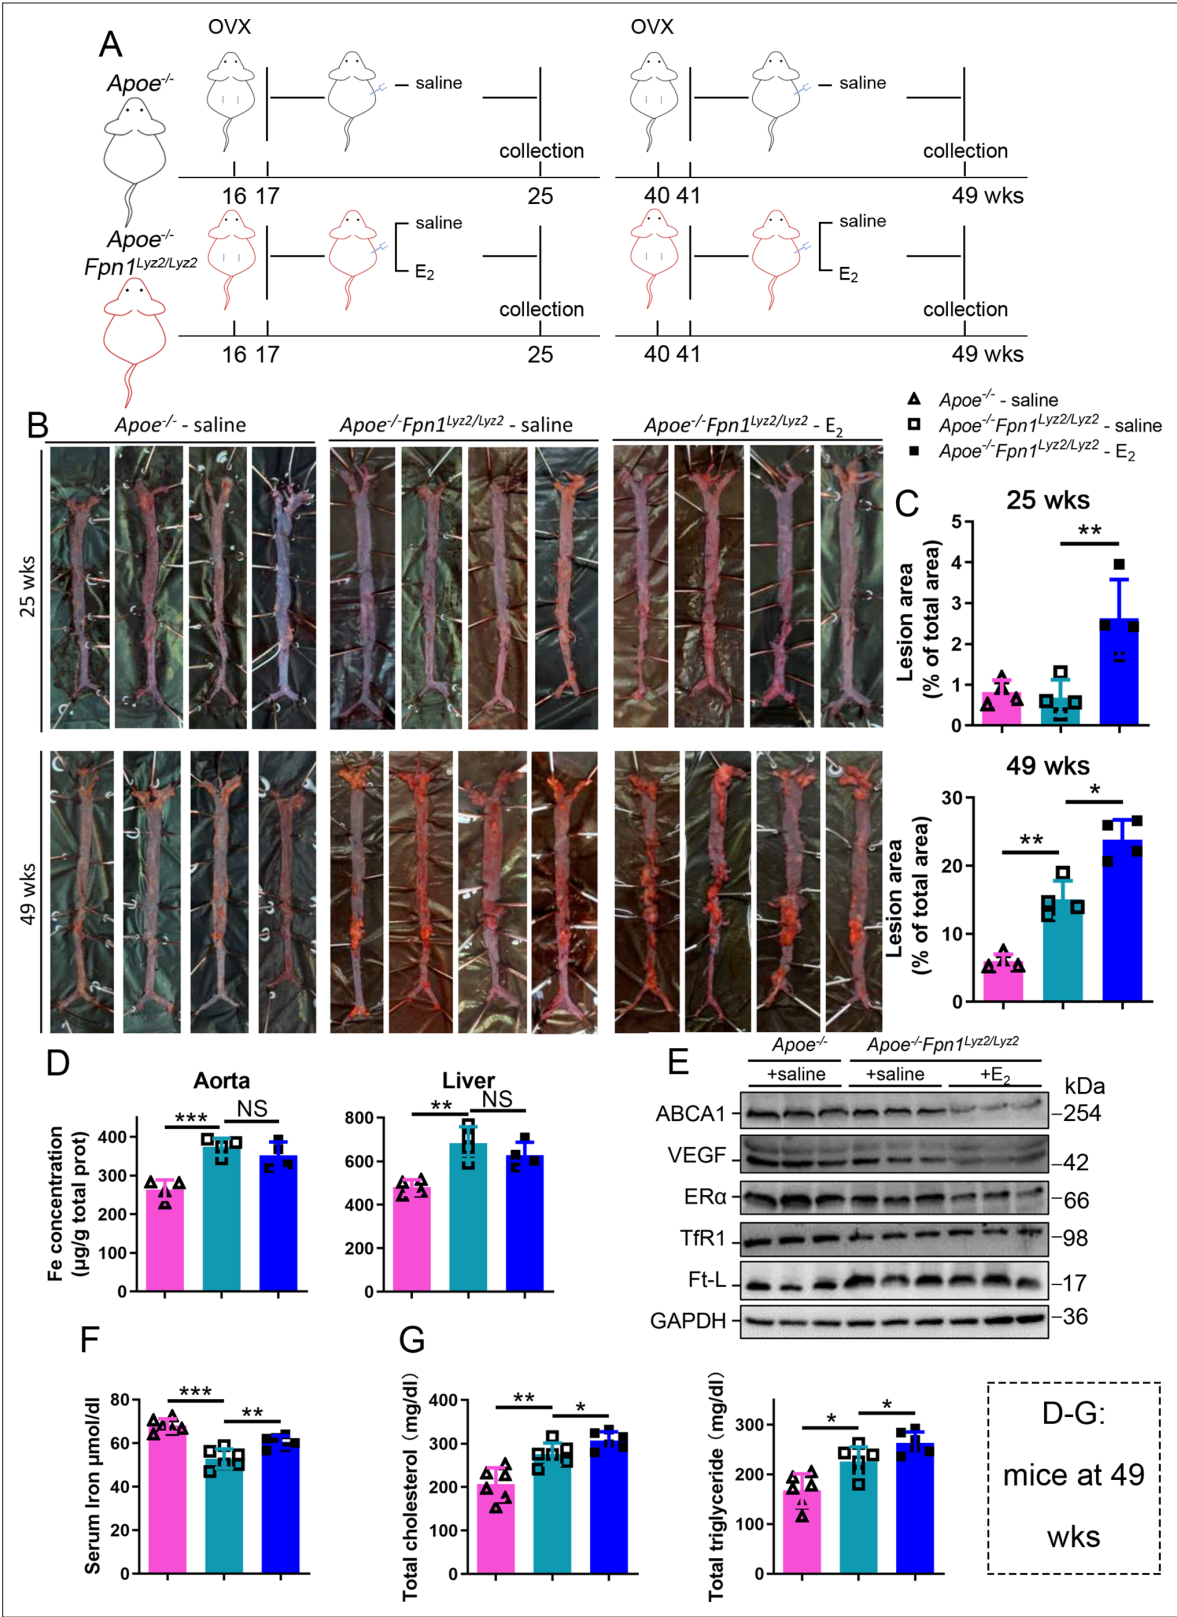

**Figure 3.** E<sub>2</sub>-triggered estrogen receptor  $\alpha$  (ER $\alpha$ ) deficiency was observed in a genetic iron overload mouse model at postmenopausal age. **(A)** Flow diagram of mouse modeling. Early groups: ovariectomy (OVX) at 16 weeks old, 1-wk recovery,  $\pm$  E<sub>2</sub> treatment for 8 wk; late groups: OVX at 40 weeks old, 1-wk recovery,  $\pm$  E<sub>2</sub> treatment for 8 wk. Saline is vehicle control. The mice were fed with normal chow. **(B)** Oil red O-stained aortic lesions in *Apoe*<sup>-/-</sup> and *Apoe*<sup>-/-</sup> *Fpn1*<sup>lyz2/lyz2</sup> mice after E<sub>2</sub> treatment for 8 wk in the early postmenopausal (EPM) or late postmenopausal (LPM) groups as indicated. **(C)** The lesion area (% of total area) at 25 and 49 weeks. **(D)** Iron concentration in aorta and liver. **(E)** Western blot analysis of ABCA1, VEGF, ER $\alpha$ , TfR1, Ft-L, and GAPDH. **(F)** Serum iron concentration. **(G)** Total cholesterol and triglyceride levels. **(D-G)** Data for mice at 49 weeks.

Figure 3 continued on next page

## Figure 3 continued

area in the aorta.  $n = 4/\text{group}$ ,  $**p < 0.01$ ,  $*p < 0.05$ . **(D)** The iron content of the aorta and liver detected by ferrozine assays.  $n = 6/\text{group}$ ,  $***p < 0.001$ ,  $**p < 0.01$ . **(E)** The expression of iron-related or ER $\alpha$ -targeted proteins in the aorta, detected by western blotting. **(F)** Serum iron level in different groups.  $n = 6/\text{group}$ ,  $***p < 0.001$ ,  $**p < 0.01$ . **(G)** Serum total cholesterol and total triglyceride levels.  $n = 6/\text{group}$ ,  $*p < 0.05$ ,  $**p < 0.01$ . The samples for **(D–G)** were from 49-week-old *Apoe*<sup>-/-</sup> and *Apoe*<sup>-/-</sup> *Fpn*<sup>1<sup>Ly22/Ly22</sup></sup> mice. Student's t-test analysis was used for **(C, D, F, G)**.

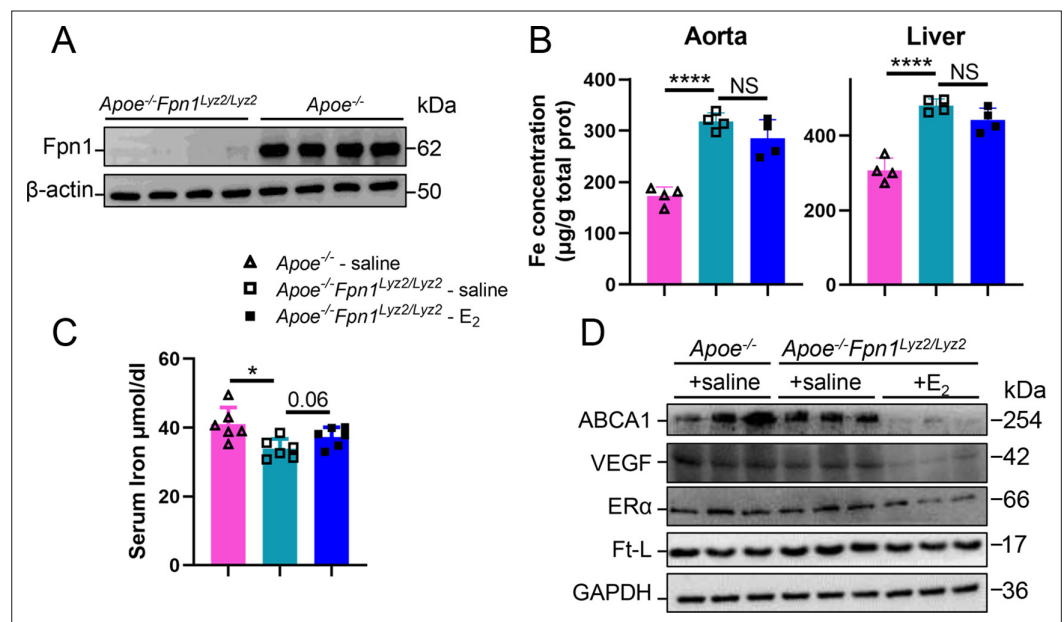

**Figure 3—figure supplement 1.** E<sub>2</sub>-triggered estrogen receptor  $\alpha$  (ER $\alpha$ ) deficiency was observed in *Apoe*<sup>-/-</sup> *Fpn1*<sup>Lyz2/Lyz2</sup> at early postmenopause (25 weeks old). (A) Fpn1 KO efficiency in peritoneal macrophages was validated. (B) Iron content of aorta and liver detected by ferrozine assays. n = 4, \*\*\*\*p < 0.0001. (C) Serum iron in different groups. n = 6, \*p < 0.05. (D) ABCA-1, ER $\alpha$ , VEGF, and Ft-L protein expression of aorta were detected. Student's t-test analysis was used for (B, C).

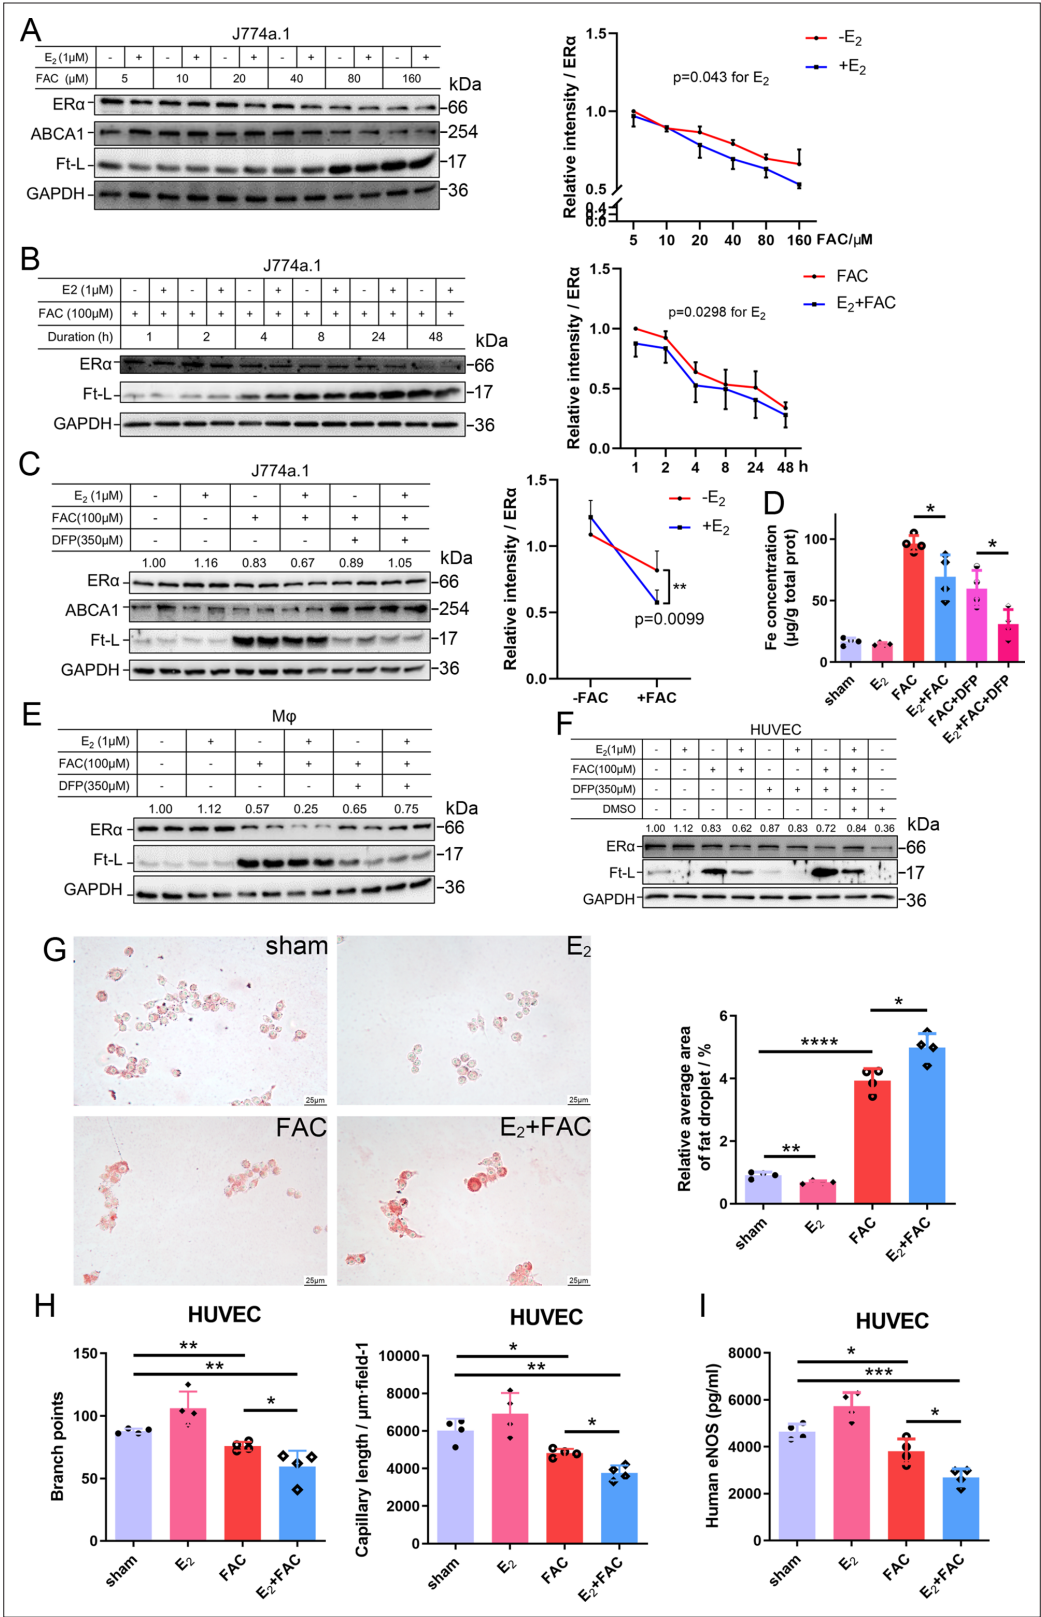

**Figure 4.** E<sub>2</sub> treatment potentiates iron-induced downregulation of estrogen receptor α (ERα) in vitro. (A, B) Left: ERα expression in the presence or absence of E<sub>2</sub> under different iron concentration conditions (A) or in the time course (B). Right: quantification data using ImageJ analysis. Two-way ANOVA was used. (C) Left: the rescue effect of iron chelation on the downregulation of ERα by FAC or FAC plus E<sub>2</sub>. Right: quantification data using ImageJ

Figure 4 continued on next page

*Figure 4 continued*

analysis. Two-way ANOVA was used for the former four groups. **(D)** The intracellular iron content in J774a.1 under different iron-concentration conditions in the presence or absence of  $E_2$ , detected by ferrozine assays.  $n = 4$ ,  $*p < 0.05$ . **(E, F)** ER $\alpha$  expression in peritoneal macrophages **(E)** and human umbilical vein endothelial cells (HUVECs) **(F)** under the indicated iron and E2 conditions. **(A–C, E, F)** are data from western blotting. The quantification is indicated as a relative intensity of ER $\alpha$  ( $n = 4$ ). **(G)** Oil red O-stained J774a.1 cells after treatment with FAC and/or  $E_2$  (left) followed by oxidized LDL uptake, quantified by the area of droplets (right). scale bar = 25  $\mu\text{m}$ ,  $n = 4$ ,  $***p < 0.001$ . **(H)** HUVEC angiogenesis assays, revealed by the number of branch points (left) and capillary length (right).  $n = 4$ ,  $*p < 0.05$ ,  $**p < 0.01$ . **(I)** eNOS level in HUVEC, assessed by ELISA.  $n = 4$ ,  $*p < 0.05$ ,  $**p < 0.01$ ,  $***p < 0.001$ . Two-way ANOVA was used for **(A–C)**. Student's *t*-test analysis was used for **(D, G–I)**.



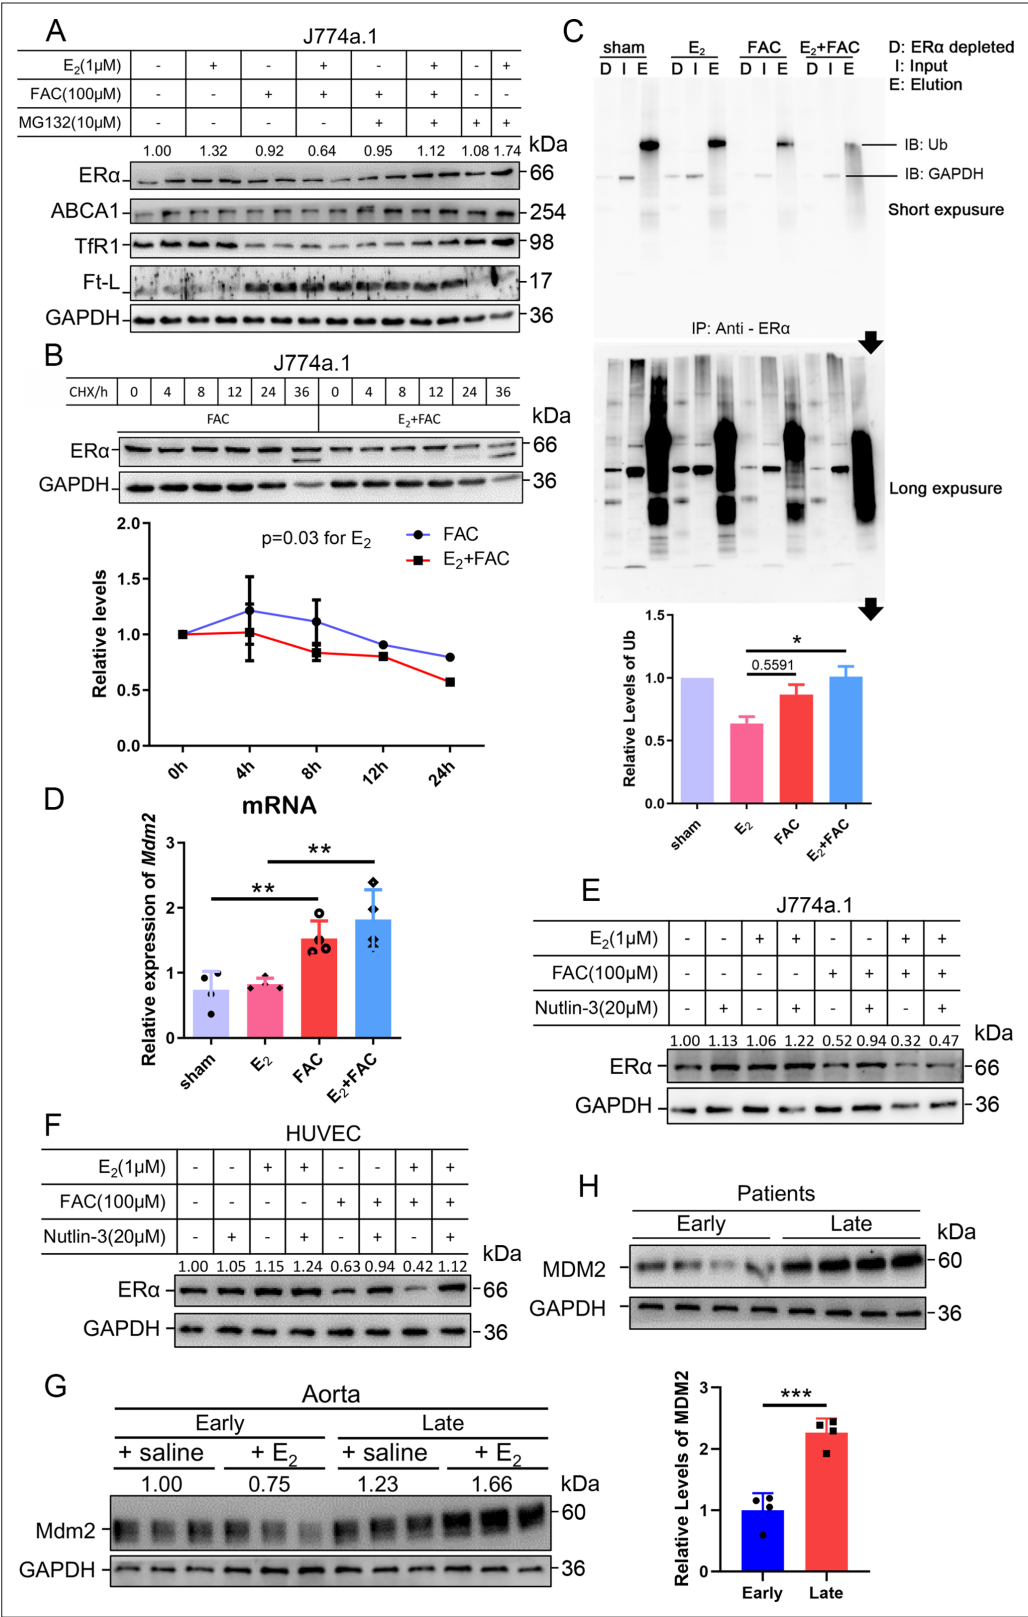

**Figure 5.** The interactive effects of iron overload and E<sub>2</sub> treatment on estrogen receptor α (ERα) downregulation are mediated by the E3 ligase MDM2. (A) Evaluation of ERα proteasome-dependent degradation in J774a.1 cells by western blotting. MG132: 10 μM. n = 4. (B) ERα turnover rate in J774a.1 cells under FAC or E<sub>2</sub> + FAC conditions, detected by western blotting after 20 μM cycloheximide (CHX) treatment. \*p<0.05 using two-way ANOVA.

Figure 5 continued on next page

*Figure 5 continued*

(C) Ubiquitination of ER $\alpha$ , evaluated by western blotting (anti-ubiquitin) following immunoprecipitation against ER $\alpha$  antibody. n = 3, \*p<0.05. (D) Relative *Mdm2* mRNA expression in J774a.1 cells, assessed by qPCR, n = 4, \*\*p<0.01. (E) The protein levels of ER $\alpha$  in the presence of FAC or FAC plus E<sub>2</sub> in J774a.1 cells after treatment of Nutlin-3, a specific antagonist of Mdm2. n = 3. (F) The protein levels of ER $\alpha$  in the presence of FAC or FAC plus E<sub>2</sub> in human umbilical vein endothelial cells (HUVECs) after treatment of Nutlin-3. n = 3. (G) Mdm2 protein expression in the aortas of mice in the early postmenopausal (EPM) or late postmenopausal (LPM) stage, as detected by western blotting. n = 3/group. (H) MDM2 protein levels in patient plaques, detected by western blotting and quantified with ImageJ. n = 4/group, \*\*\*p<0.001. Two-way ANOVA was used for (B). Student's *t*-test analysis was used for (C, D H).

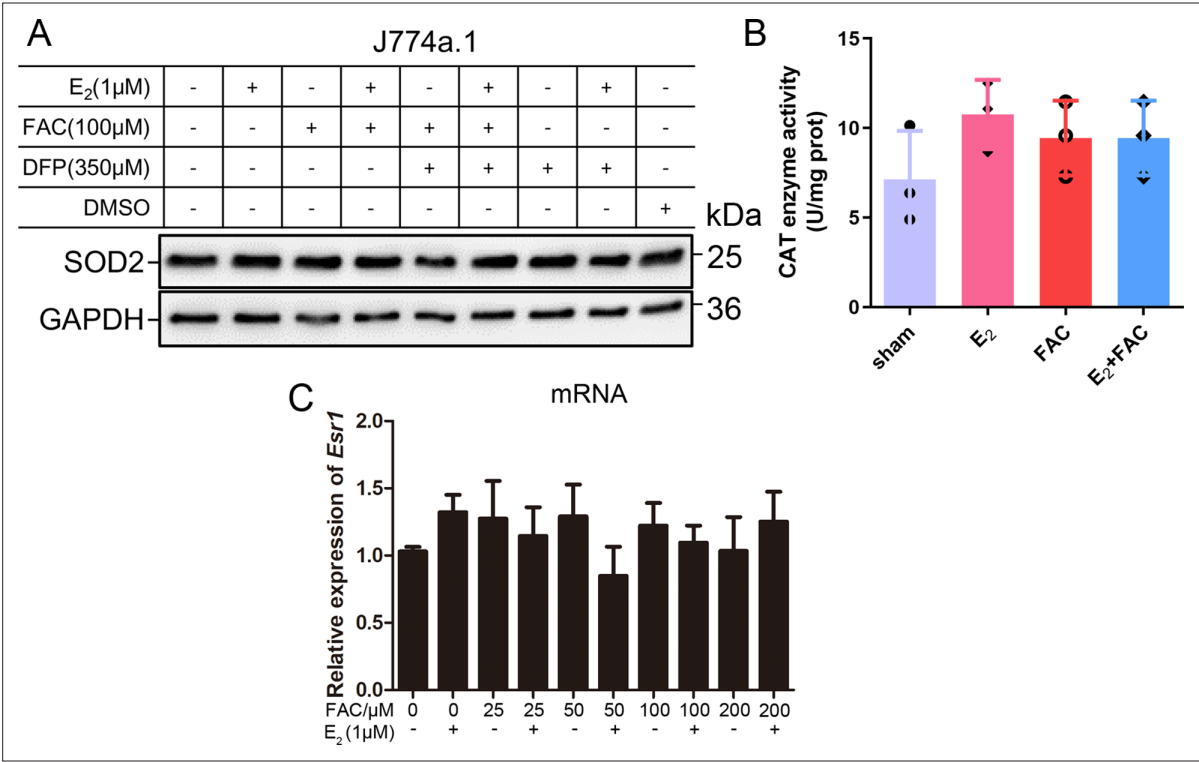

**Figure 5—figure supplement 1.** No significant oxidative-stress was raised by application of E<sub>2</sub> and iron within the indicated concentration. **(A)** SOD2 protein levels of J774a.1 post treatments with FAC/DFP in the presence/absence of E<sub>2</sub>. **(B)** The enzymatic activity of catalase in J774a.1. n = 4. **(C)** Relative ERα mRNA expression of J774a.1 treated with different concentrations of FAC in the presence/absence of E<sub>2</sub>, assessed by qPCR. n = 5. Student's t-test analysis was used for **(B, C)**.

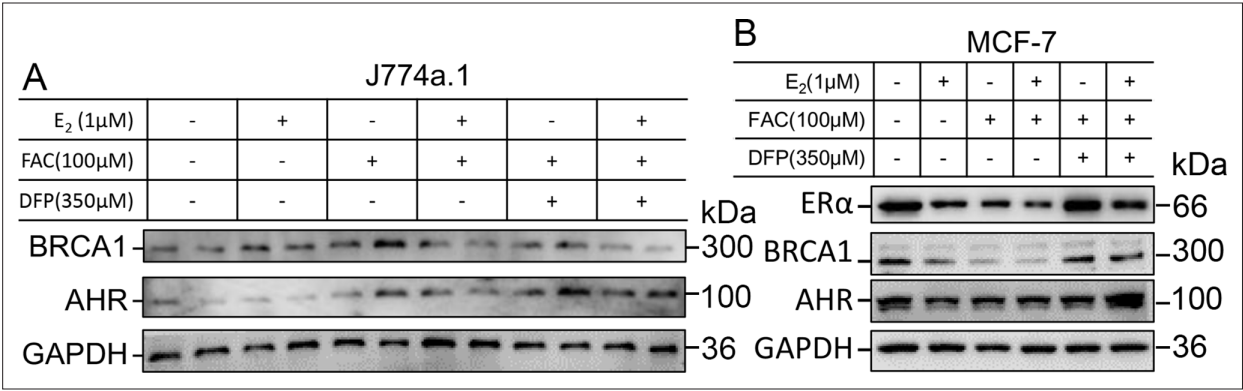

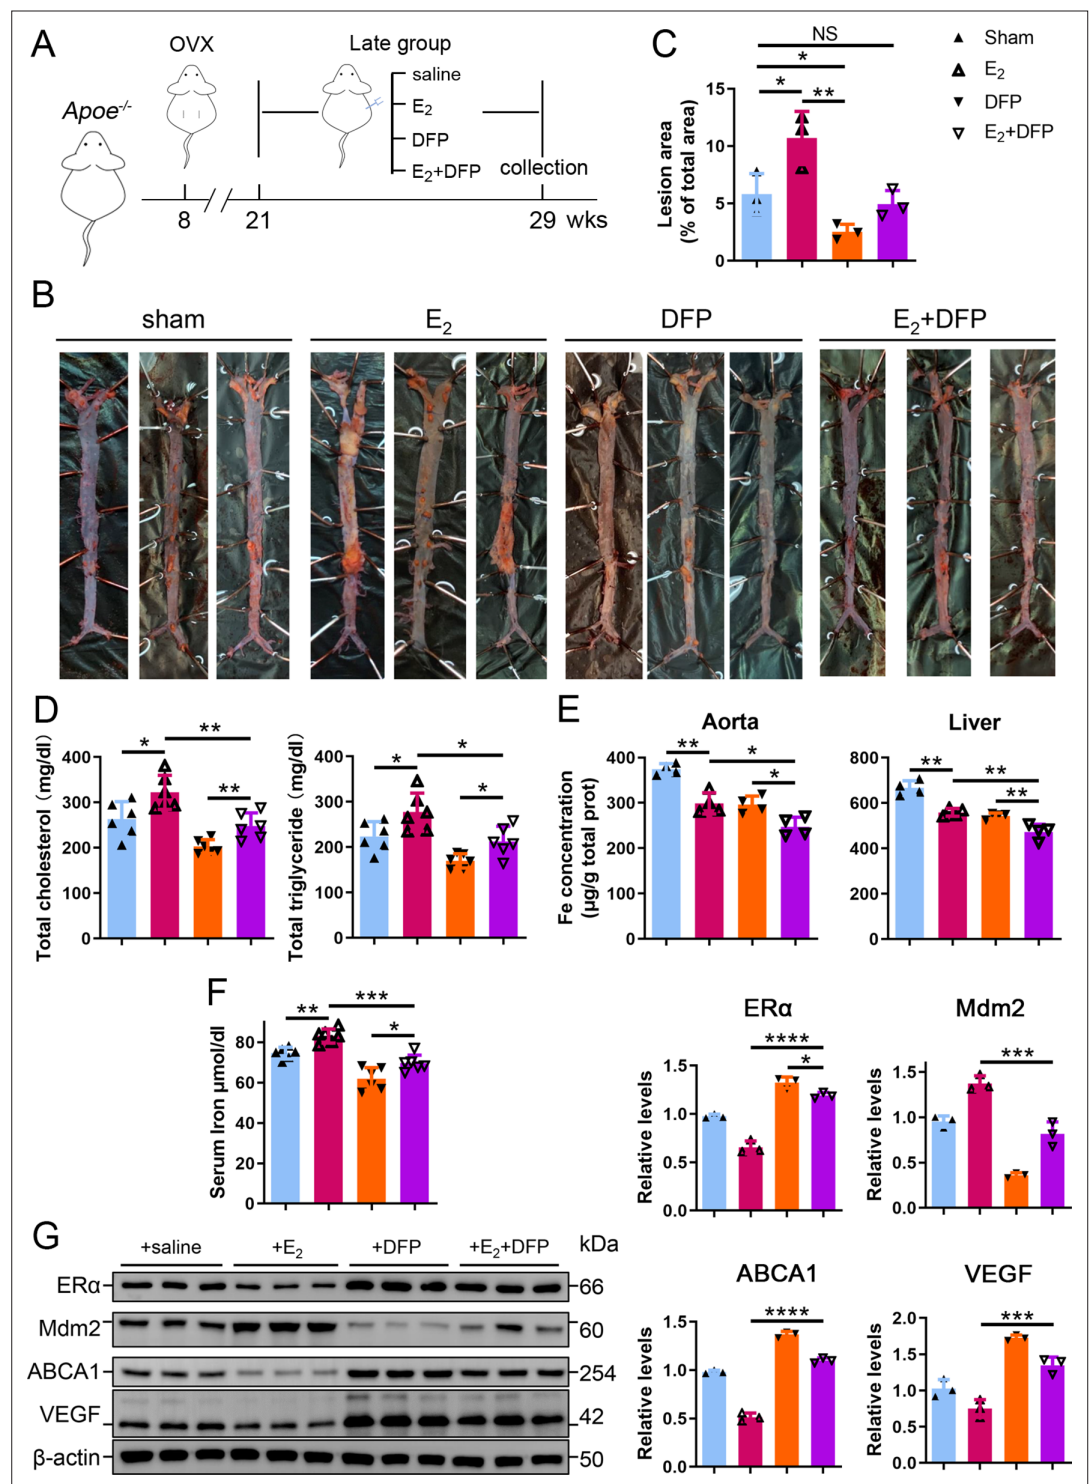

**Figure 6.** Iron restriction therapy restored estrogen receptor  $\alpha$  (ER $\alpha$ ) levels and attenuated E $_2$ -triggered progressive atherosclerosis in late postmenopausal mice. **(A)** Flow diagram of mouse modeling. The mice were ovariectomized (OVX) at 8 weeks old and E $_2$ , DFP or E $_2$  + DFP treated from 21 weeks old to 29 weeks old for 8 wk. Saline is vehicle control. Mice were fed high-fat chow one week after OVX. 13 wk post-OVX is considered as late postmenopause. **(B)** Oil red O-stained aortic lesions in Apoe $^{-/-}$  mice treated with E $_2$ , DFP or E $_2$  + DFP as indicated. **(C)** The quantified lesion area of atherosclerotic plaques in the aorta from **(B)**. n = 3, \*\*p<0.01, \*p<0.05. **(D)** Serum total cholesterol and total triglyceride levels. n = 6, \*p<0.05, \*\*p<0.01. **(E)** The iron content in the aorta and liver, detected by ferrozine assays. n = 4, \*\*p<0.01, \*p<0.05. **(F)** Determination of serum iron in different groups. n

Figure 6 continued on next page

*Figure 6 continued*

= 6, \*\*\* $p < 0.001$ , \*\* $p < 0.01$ , \* $p < 0.05$ . (G) Protein expression in the aorta, detected by western blotting (left) and quantified with ImageJ (right).  $n = 3$ . \*\*\*\* $p < 0.0001$ , \*\*\* $p < 0.001$ , \* $p < 0.05$ . Student's  $t$ -test analysis was used for (C–G).



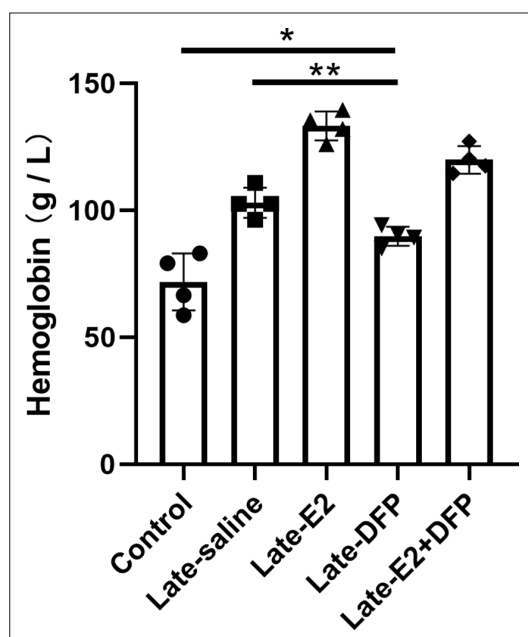

**Figure 6—figure supplement 1.** Serum hemoglobin after DFP administration with Student's *t*-test analysis (80 mg/kg, daily for 8 wk, *Apoe*<sup>-/-</sup>, age 8 wk for Control, and 29 wk for the late, *n* = 4).

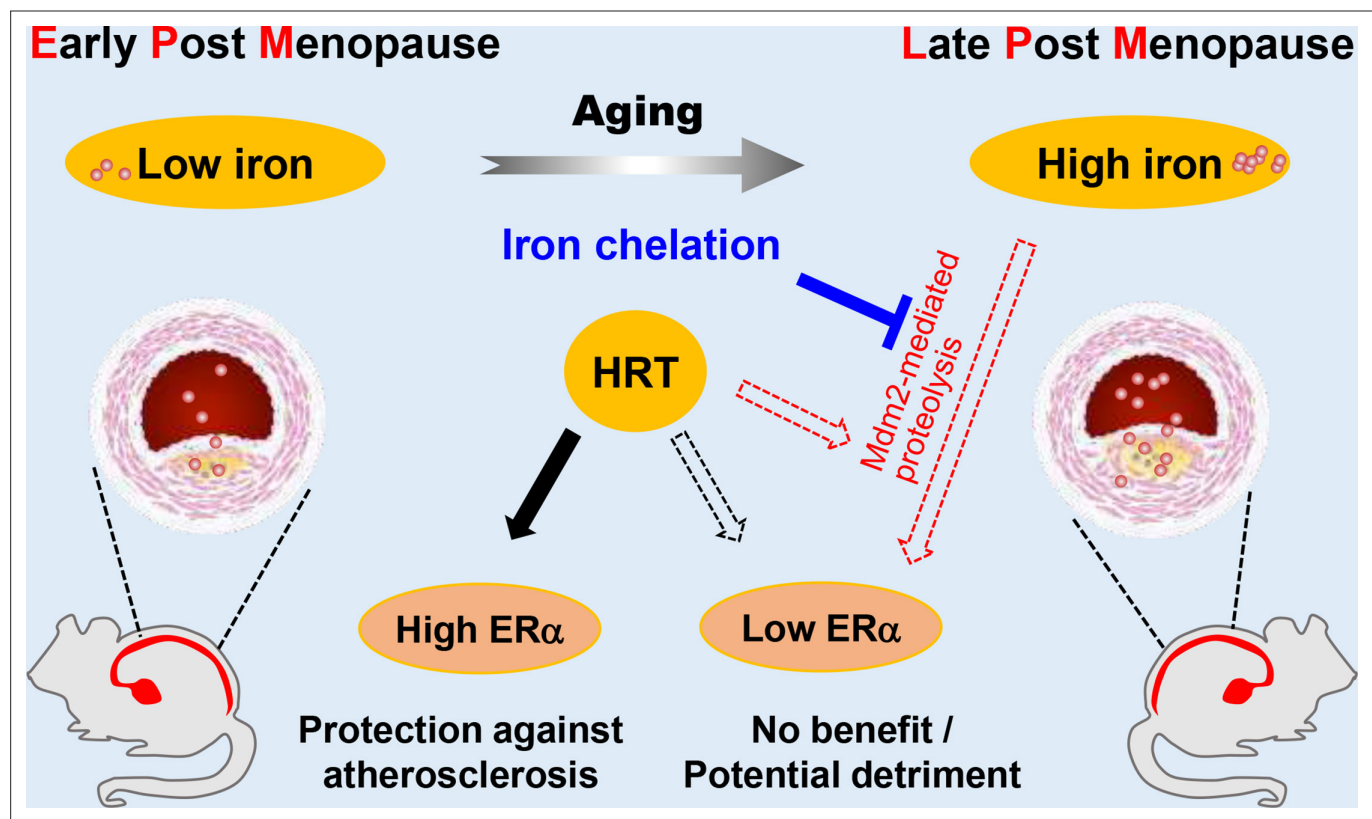

**Figure 7.** Schematic model for the effects of postmenopausal iron accumulation with or without hormone replacement therapy (HRT) on atherosclerosis (AS) severity through modulating estrogen receptor  $\alpha$  (ER $\alpha$ ) expression. Iron accumulation occurs naturally and gradually after menopause. In early postmenopausal (EPM), iron retention was mild, and ER $\alpha$  was responsive to HRT application to achieve protective effects. However, when iron overload is significant in late postmenopausal (LPM), Mdm2 is upregulated along with ER $\alpha$  downregulation. This negative correlation is potentiated by the application of HRT and iron accumulation with aging. Therefore, HRT use avails to aggravate the progression of AS in the LPM period. Iron chelation, however, reverses the adverse effect of HRT and attenuates the accelerated development of AS, suggesting a protective role of appropriate iron restriction in the LPM stage.
