# Supplementary figures and images for: Hormone replacement therapy for postmenopausal atherosclerosis is offset by late age iron deposition
Source: eLife journal article supplement (doi:10.7554/elife.80494), 2022-10-17

sham

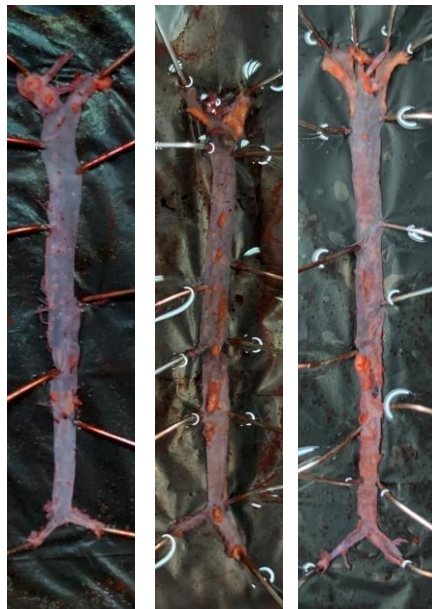

E<sub>2</sub>

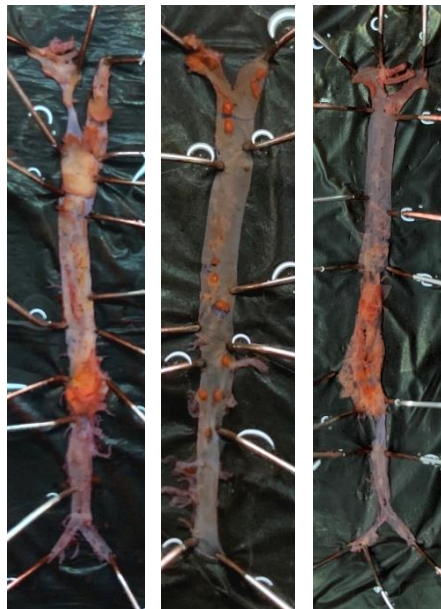

DFP

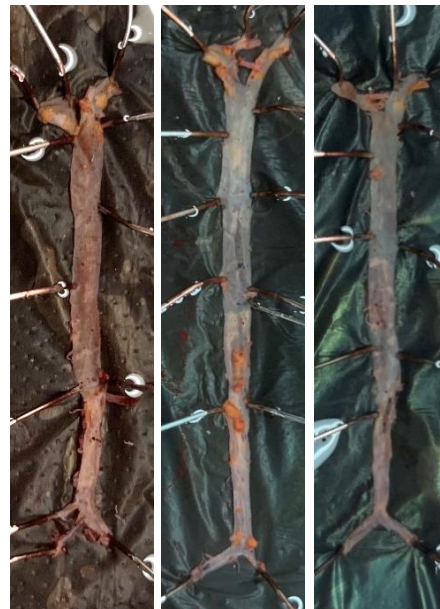

E<sub>2</sub>+DFP

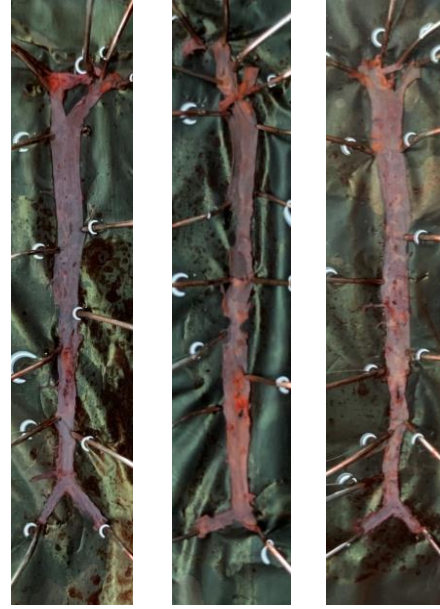

Supplement: fig6-data1 [file elife-80494-fig6-data1-v1.zip]
